# Supplementary material for: Fear of movement/(Re)injury in low back pain: confirmatory validation of a German version of the Tampa Scale for Kinesiophobia
Source: PubMed Central journal article supplement (PMC4246485; doi:10.1186/1471-2474-15-280), 2014-08-19
Supplement: 12891_2013_2314_MOESM2_ESM.pdf [file 12891_2013_2314_MOESM2_ESM.pdf]

## Tampa Scale for Kinesiophobia - German Version (TSK-GV).

Mit den nachfolgenden Fragen möchten wir untersuchen, wie Sie selbst zu Ihren Schmerzen stehen.

Bitte geben Sie an, in welchem Maß Sie der vorgegebenen Aussage zustimmen. Bitte kreuzen Sie dafür bei jeder Frage das entsprechende Kästchen an. (Ein Kreuz pro Frage.)

| Item | Frage                                                                                                                                             | Überhaupt<br><b>nicht</b><br>einverstanden | Mehr oder<br>weniger <b>nicht</b><br>einverstanden | Mehr oder<br>weniger<br>einverstanden | Völlig<br>einverstanden  |
|------|---------------------------------------------------------------------------------------------------------------------------------------------------|--------------------------------------------|----------------------------------------------------|---------------------------------------|--------------------------|
| 1    | Ich habe Angst davor, dass ich mich möglicherweise verletze, wenn ich Sport treibe.                                                               | <input type="checkbox"/>                   | <input type="checkbox"/>                           | <input type="checkbox"/>              | <input type="checkbox"/> |
| 2    | Wenn ich versuchen würde, mich über die Schmerzen hinweg zu setzen, würden sie noch schlimmer.                                                    | <input type="checkbox"/>                   | <input type="checkbox"/>                           | <input type="checkbox"/>              | <input type="checkbox"/> |
| 3    | Mein Körper sagt mir, dass ich etwas sehr Schlimmes habe.                                                                                         | <input type="checkbox"/>                   | <input type="checkbox"/>                           | <input type="checkbox"/>              | <input type="checkbox"/> |
| 4    | Mein Gesundheitszustand wird von anderen nicht ernst genug genommen.                                                                              | <input type="checkbox"/>                   | <input type="checkbox"/>                           | <input type="checkbox"/>              | <input type="checkbox"/> |
| 5    | Wegen des Schmerzproblems ist mein Körper für den Rest meines Lebens gefährdet.                                                                   | <input type="checkbox"/>                   | <input type="checkbox"/>                           | <input type="checkbox"/>              | <input type="checkbox"/> |
| 6    | Schmerz bedeutet immer, dass ich mich verletzt habe.                                                                                              | <input type="checkbox"/>                   | <input type="checkbox"/>                           | <input type="checkbox"/>              | <input type="checkbox"/> |
| 7    | Die sicherste Art, zu verhindern, dass meine Schmerzen schlimmer werden, ist einfach darauf zu achten, dass ich keine unnötigen Bewegungen mache. | <input type="checkbox"/>                   | <input type="checkbox"/>                           | <input type="checkbox"/>              | <input type="checkbox"/> |
| 8    | Ich hätte nicht so viel Schmerzen, wenn nicht etwas Bedenkliches in meinem Körper vor sich ginge.                                                 | <input type="checkbox"/>                   | <input type="checkbox"/>                           | <input type="checkbox"/>              | <input type="checkbox"/> |
| 9    | Meine Schmerzen sagen mir, wann ich mit dem Training aufhören muss, um mich nicht zu verletzen.                                                   | <input type="checkbox"/>                   | <input type="checkbox"/>                           | <input type="checkbox"/>              | <input type="checkbox"/> |
| 10   | Ich kann nicht all die Dinge tun, die gesunde Menschen machen, da ich mich zu leicht verletzen könnte.                                            | <input type="checkbox"/>                   | <input type="checkbox"/>                           | <input type="checkbox"/>              | <input type="checkbox"/> |
| 11   | Niemand sollte Sport treiben müssen, wenn er/sie Schmerzen hat.                                                                                   | <input type="checkbox"/>                   | <input type="checkbox"/>                           | <input type="checkbox"/>              | <input type="checkbox"/> |
